# Supplementary material for: All-exciplex-based white organic light-emitting diodes by employing an interface-free sandwich light-emitting unit achieving high electroluminescence performance
Source: Royal Society of Chemistry journal article supplement (doi:10.1039/d0tc02915g), 2020-01-01
Supplement: d0tc02915g1.pdf [file d0tc02915g1.pdf]

## Supporting information

### **All-exciplex-based white organic light-emitting diodes by employing an interface-free sandwich light-emitting unit achieving high electroluminescence performance**

Yuanyuan Guo<sup>a,1</sup>, Yaping Zhao<sup>b,1</sup>, Yanqin Miao<sup>b,\*</sup>, Longsheng Wang<sup>a</sup>, Tianbao Li<sup>b</sup>,  
Hua Wang<sup>b</sup>, Bingshe Xu<sup>b,c,\*</sup>, Jnsheng Yu<sup>d</sup>

<sup>a</sup>*Key Laboratory of Advanced Transducers and Intelligent Control System, Ministry of Education, Taiyuan University of Technology, Taiyuan, 030024, China*

<sup>b</sup>*Key Laboratory of Interface Science and Engineering in Advanced Materials, Ministry of Education, Taiyuan University of Technology, Taiyuan, 030024, China*

<sup>c</sup>*Materials Institute of Atomic and Molecular Science, Shaanxi University of Science & Technology, Xi'An 710021, China*

<sup>d</sup>*State Key Laboratory of Electronic Thin Films and Integrated Devices, University of Electronic Science and Technology of China (UESTC), Chengdu 610054, China*

<sup>1</sup> Yuanyuan Guo and Yaping Zhao contributed equally to this work.

**Corresponding E-mails:** miaoyanqin@tyut.edu.cn (**Yanqin Miao**); xubs@tyut.edu.cn (**Bingshe Xu**)

## Section S1

The ITO substrates were cleaned first with acetone, deionized water and acetone, and then dried in drying cabinet, and treated with ultraviolet-ozone for 15 min. After these processes, the cleaned ITO glass substrates were loaded in a vacuum chamber, a base pressure of  $\leq 5 \times 10^{-4}$  Pa, for film deposition using thermal evaporation technology. The deposition rate and film thickness were monitored controlled by the calibrated crystal quartz sensors, e.g., the deposition rates of organic materials, MoO<sub>3</sub>, LiF, and cathode Al were controlled at about 1 Å/s, 0.3 Å/s, 0.1 Å/s, and 3–6 Å/s, respectively. Organic films for PL measurements were fabricated with the same method as device fabrication. The EL spectra and CIE coordinates of all OLEDs were measured by a computer controlled PR-655 spectra scan spectrometer. The current density-voltage-luminance characteristics, current efficiency, and power efficiency were recorded by a computer-controlled Keithley 2400 source integrated with a BM-70A luminance meter. The EQE was calculated from the current density-voltage-luminance curve and spectra data.

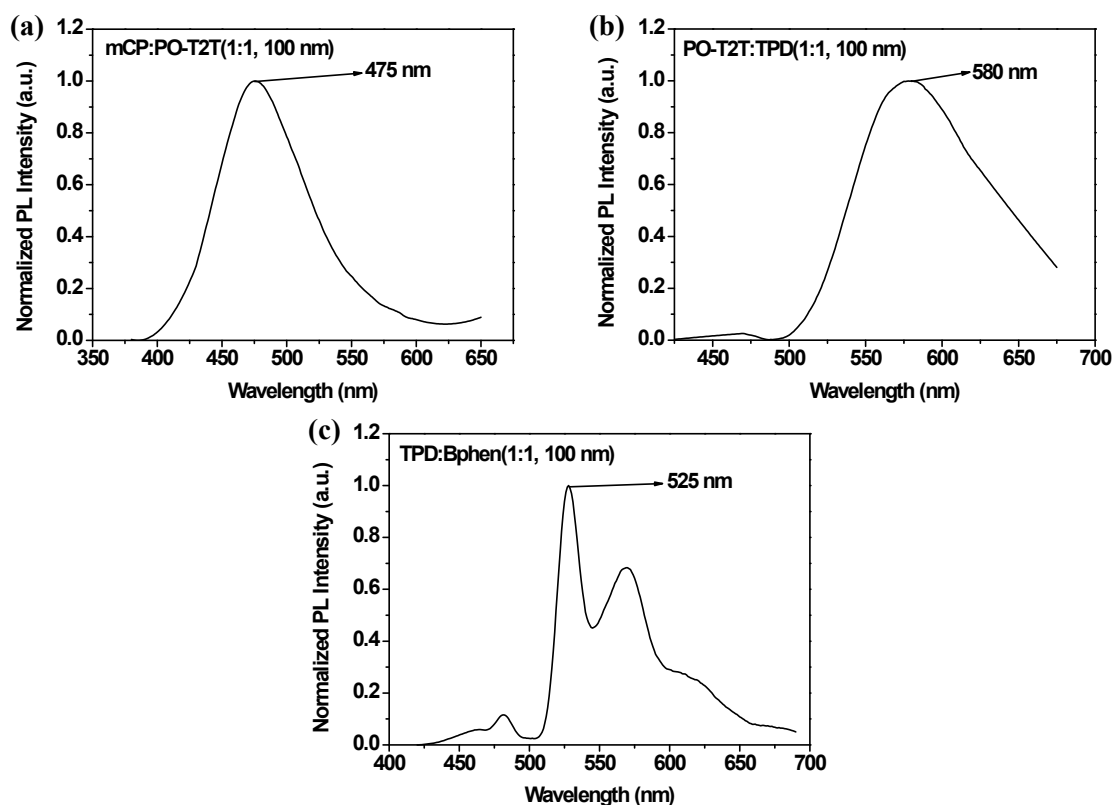

**Fig. S1** The normalized phosphorescence spectra for mCP:PO-T2T(1:1, 100 nm), PO-T2T:TPD(1:1, 100 nm), and TPD:Bphen(1:1, 100 nm) films at 77 K.

**Table S1** Summary of key parameters for three mCP:PO-T2T-, PO-T2T:TPD- and TPD:Bphen-forming exciplex.

| Exciplex   | PL peak<br>(nm) | $S_1^a$<br>(eV) | $T_1^b$<br>(eV) | $\Delta E_{ST}^c$<br>(eV) | $\tau_1^d$<br>(ns) | $\tau_2^e$<br>(ns) | PLQY <sup>f</sup><br>(%) |
|------------|-----------------|-----------------|-----------------|---------------------------|--------------------|--------------------|--------------------------|
| mCP:PO-T2T | 471             | 2.63            | 2.61            | 0.02                      | 380.00             | 7380.00            | 17.76                    |
| PO-T2T:TPD | 565             | 2.20            | 2.14            | 0.06                      | 8.62               | 48.20              | 4.90                     |
| TPD:Bphen  | 462             | 2.68            | 2.35            | 0.33                      | 8.13               | 36.49              | 6.18                     |

<sup>a</sup> $S_1$  is the singlet energy level;

<sup>b</sup> $T_1$  is the triplet energy level;

<sup>c</sup> $\Delta E_{ST}$  is the singlet–triplet energy splitting;

<sup>d</sup> $\tau_1$  is the prompt lifetime;

<sup>e</sup> $\tau_2$  is the delayed lifetime;

<sup>f</sup>The PLQY of three exciplex are tested by using the integrating sphere method at an atmosphere environment.

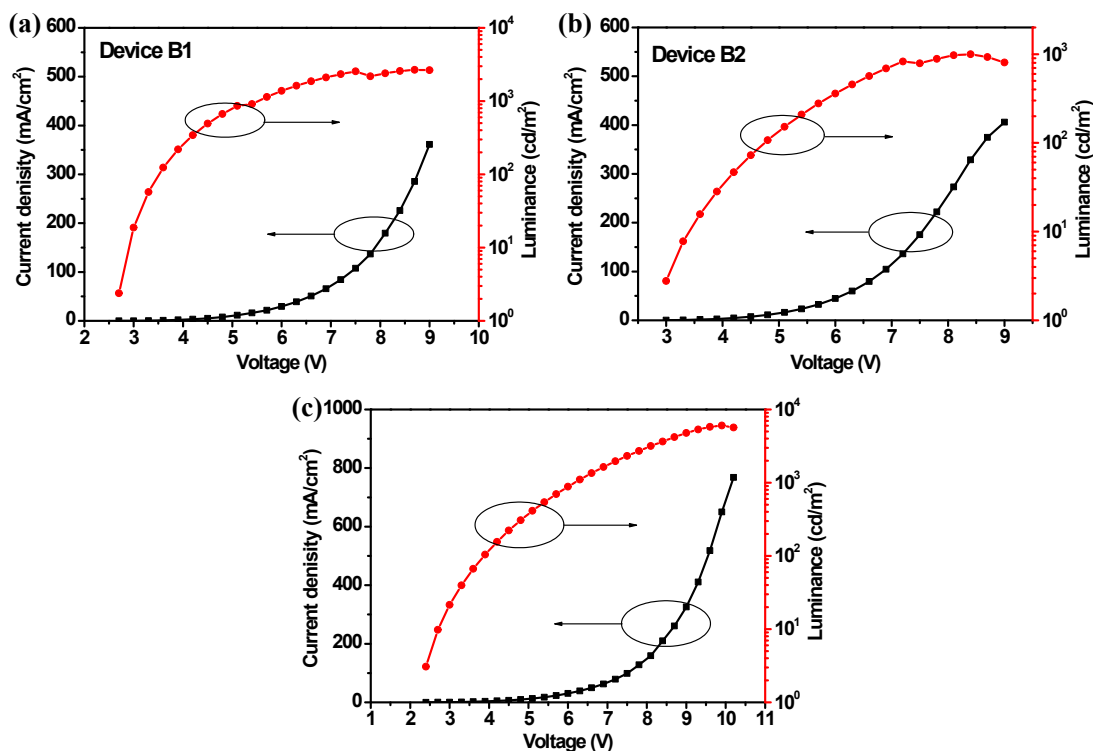

Fig. S2 The current density-voltage-luminance curves for devices B1, B2 and Y.

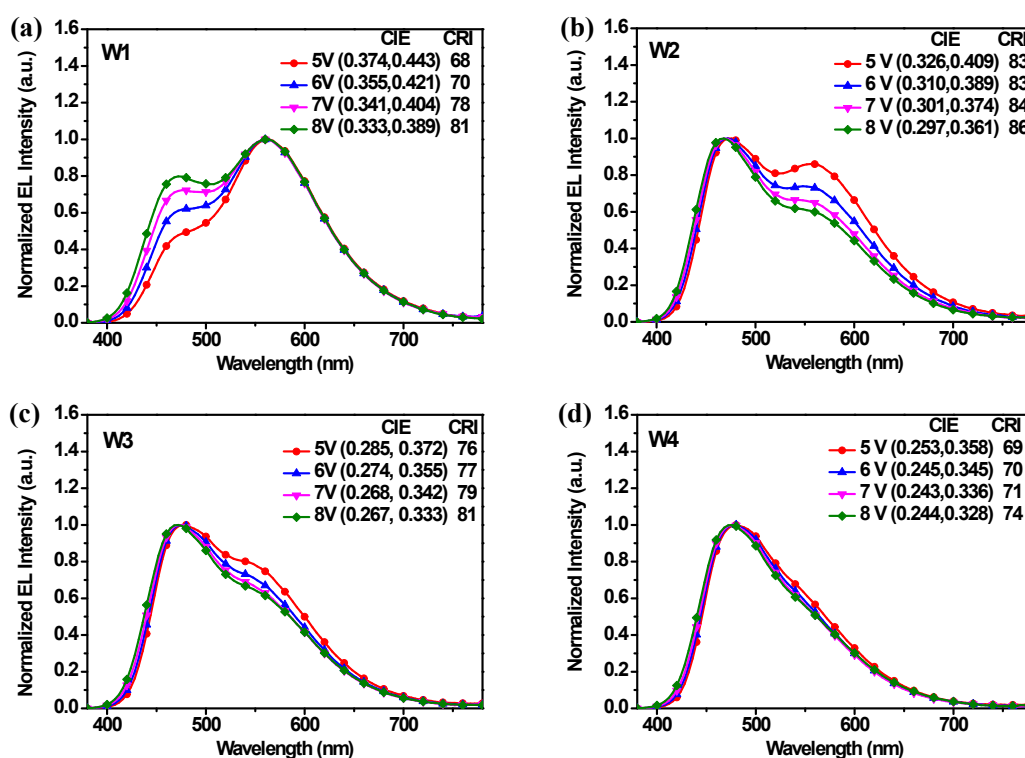

Fig. S3 The normalized EL spectra, CIE coordinates and CRI of four devices W1-W4 at different

voltages from 5V to 8V.

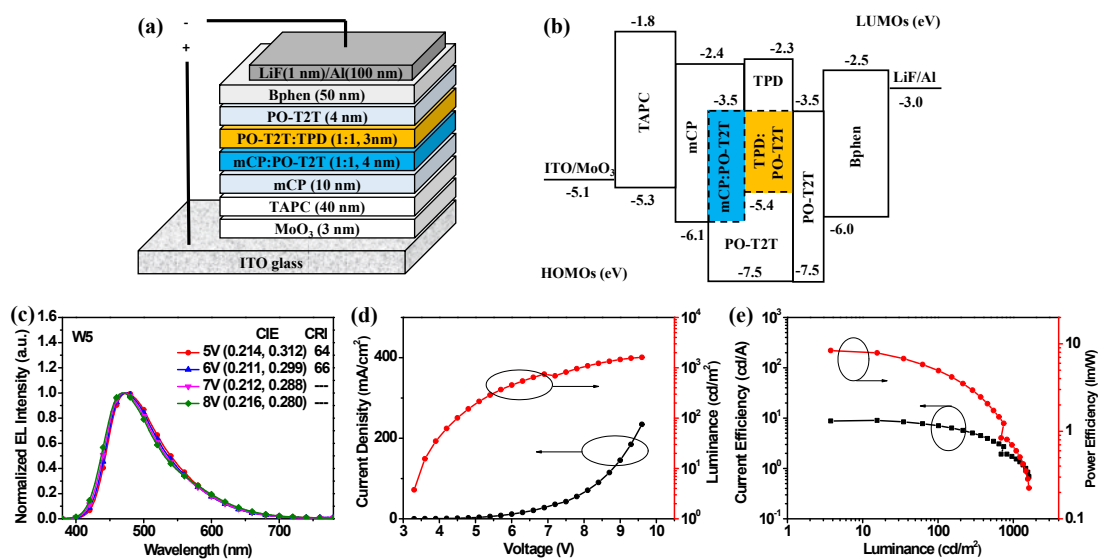

**Fig. S4** The device structure (a) and energy levels (b) diagrams for white device W5; The normalized EL spectra, CIE coordinates and CRI under different voltages (c), current density-voltage-luminance curves (d), and current efficiency-luminance-power efficiency curves (e) for the white devices W5.

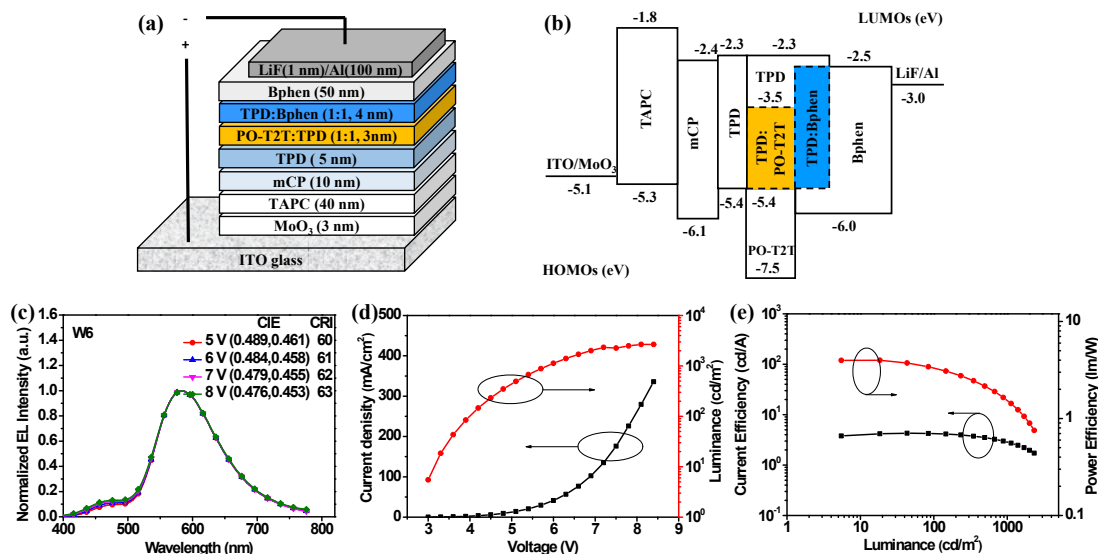

**Fig. S5** The device structure (a) and energy levels (b) diagrams for white device W6; The normalized EL spectra, CIE coordinates and CRI under different voltages (c), current density-voltage-luminance curves (d), and current efficiency-luminance-power efficiency curves (e) for the white devices W6.
